# Supplementary figures and images for: Angiopoietin-2 and Angiopoietin-like Proteins with a Prospective Role in Predicting Diabetic Nephropathy
Source: MDPI journal article supplement (doi:10.3390/biomedicines12050949), 2024-04-24

Figure S1

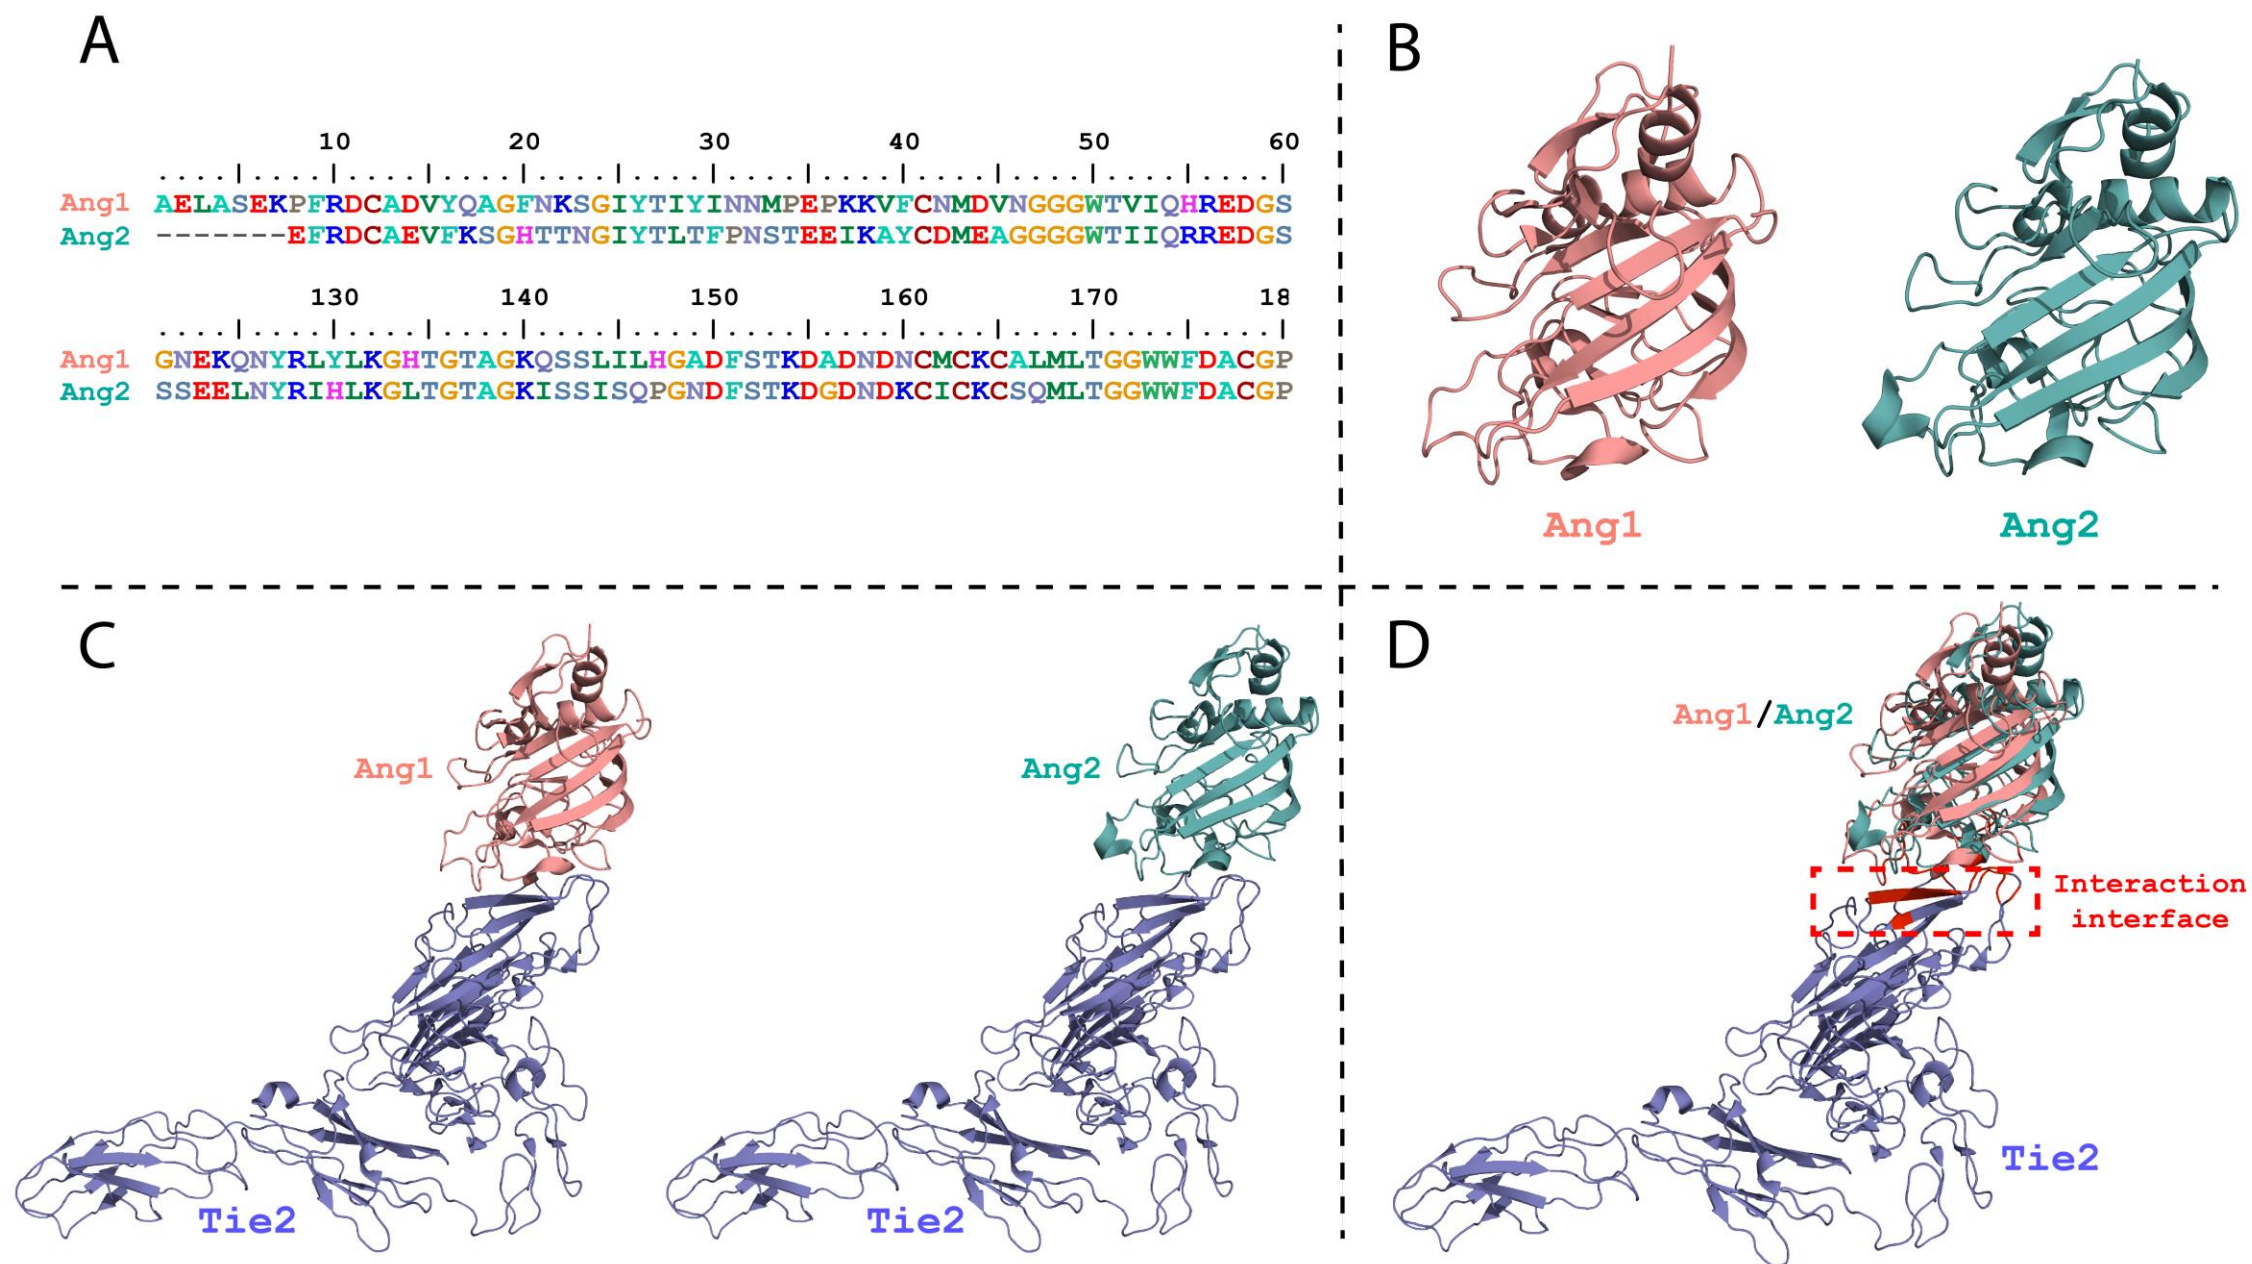

**Figure S.2**

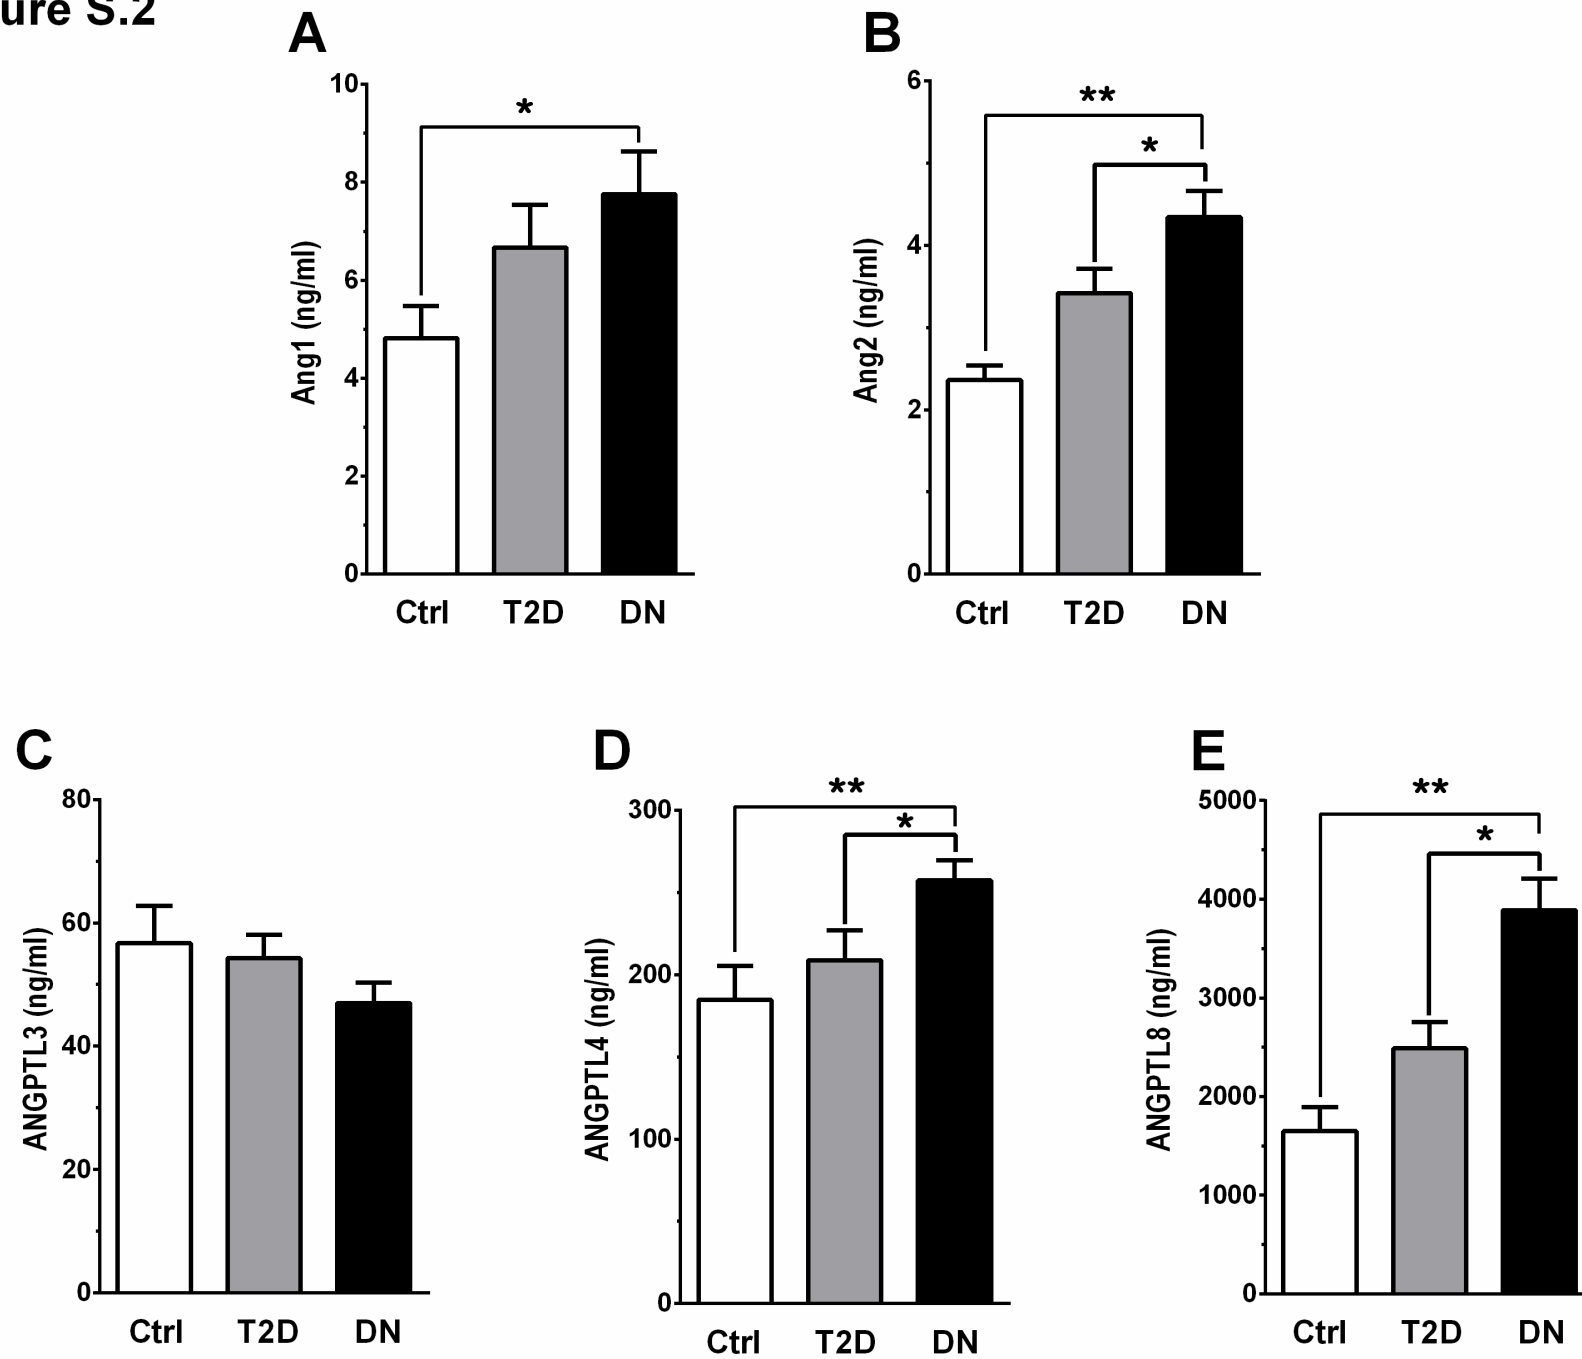

Supplement: s1 [file s1]
